# Supplementary material for: Maternal diet-induced obesity programmes cardiac dysfunction in male mice independently of post-weaning diet
Source: PubMed Central journal article supplement (PMC6054211; doi:10.1093/cvr/cvy082), 2018-04-04

**Supplementary Table 1. Primer sequences**

| Gene name       | Forward (5'->3')                | Reverse (3'->5')          |
|-----------------|---------------------------------|---------------------------|
| <i>Nppa</i>     | GGAGCCTACGAAGATCCAGC            | TTCGGTACCGGAAGCTGTTG      |
| <i>Nppb</i>     | GGTCCAGCAGAGACCTCAAA            | CAACTTCAGTGC GTTACAGCC    |
| <i>Myh6</i>     | CTGTTCCCTCTCTCCGTCCAG           | ATTCTGTCACTCAA ACTCTGGTTA |
| <i>Myh7</i>     | CGCATCAAGGAGCTCACC              | CTGCAGCCGCAGTAGGTT        |
| <i>Acta1</i>    | CAGAGTCAGAGCAGCAGAAACT          | AGCCGTTGTCACACACAAGA      |
| <i>Serca2a</i>  | TTTGCCGCTCATTTTCCAGA            | GGCTGCACACACTCTTTACC      |
| <i>Tnnt2</i>    | AGCCCACATGCCTGCTTAAA            | TCTCGGCTCTCCCTCTGAAC      |
| <i>Colla1</i>   | CGATGGATTCCCGTTCGAGT            | CGATCTCGTTGGATCCCTGG      |
| <i>Col3a1</i>   | GAGGGCCATAGCTGAACTGA            | TGACTGTCCCACGTAAGCAC      |
| <i>Nox2</i>     | GGGAACTGGGCTGTGAATGA            | CAGTGCTGACCCAAGGAGTT      |
| <i>Nox4</i>     | CCAAATGTTGGGCGATTGTGT           | CAGGACTGTCCGGCACATAG      |
| <i>Nos3</i>     | Taqman Probe                    | mm00435204_m1             |
| <i>Ucp1</i>     | CCCGCTGGACACTGCC                | ACCTAATGGTACTGGAAGCCTGG   |
| <i>Ppargc1a</i> | TCTTTGCAGTGTGCTGCTCT            | CGCTACACCACTTCAATCCA      |
| <i>Ppara</i>    | TGCAGCCTCAGCCAAGTTGAA           | CCCGAACTTGACCAGCCACA      |
| <i>Pparg</i>    | TTTAAAAACAAGACTACCCTTTACTGAAATT | AGAGGTCCACAGAGCTGATTCC    |
| <i>Gapdh</i>    | CAACGGGAAGCCCATCAC              | GCCTCACCCCATTTGATGTT      |
| <i>Sdha</i>     | TTCCGTGTGGGGAGTGTATTG           | ATTCTGCAGCTCCAGGGTCTC     |
| <i>36b4</i>     | AGATGCAGCAGATCCGCAT             | GTTCTTGCCCATCAGCACC       |

**Supplementary Table 2.**

|                         | <b>CC</b>  | <b>CO</b>    | <b>OC</b>  | <b>OO</b>    | <b>MD</b>              | <b>PD</b> | <b>MDXPD</b> |
|-------------------------|------------|--------------|------------|--------------|------------------------|-----------|--------------|
|                         |            |              |            |              | <b><i>P</i>-values</b> |           |              |
| Mesenteric (g)          | 0.17±0.01  | 0.30±0.06    | 0.21±0.02  | 0.33±0.05*   | 0.4207                 | 0.0047    | 0.8767       |
| <i>as % body weight</i> | 0.70±0.05  | 1.02±0.2     | 0.85±0.1   | 1.06±0.1     | 0.4111                 | 0.0360    | 0.6629       |
| Epididymal (g)          | 0.24±0.03  | 0.94±0.15**  | 0.40±0.025 | 1.15±0.23*** | 0.1674                 | <0.0001   | 0.8680       |
| <i>as % body weight</i> | 0.95±0.1   | 3.2±0.4***   | 1.62±0.1   | 3.7±0.5***   | 0.1087                 | <0.0001   | 0.8849       |
| Retroperitoneal (g)     | 0.05±0.008 | 0.27±0.05*** | 0.10±0.02  | 0.26±0.05**  | 0.6661                 | <0.0001   | 0.3590       |
| <i>as % body weight</i> | 0.20±0.03  | 0.92±0.2***  | 0.41±0.07  | 0.80±0.1**   | 0.6924                 | <0.0001   | 0.1447       |
| BAT                     | 0.07±0.006 | 0.12±0.01**  | 0.08±0.004 | 0.17±0.02*** | 0.0280                 | <0.0001   | 0.1039       |
| <i>as % body weight</i> | 0.29±0.02  | 0.42±0.03*   | 0.32±0.02  | 0.55±0.05*** | 0.0159                 | <0.0001   | 0.1098       |

Supplementary Figure 1.

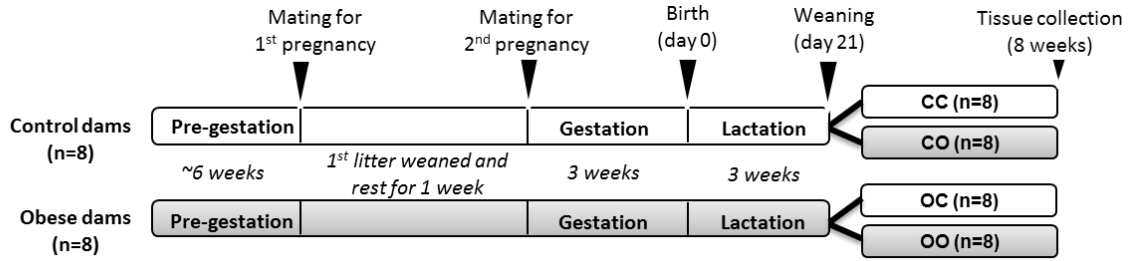

Supplementary Figure 2.

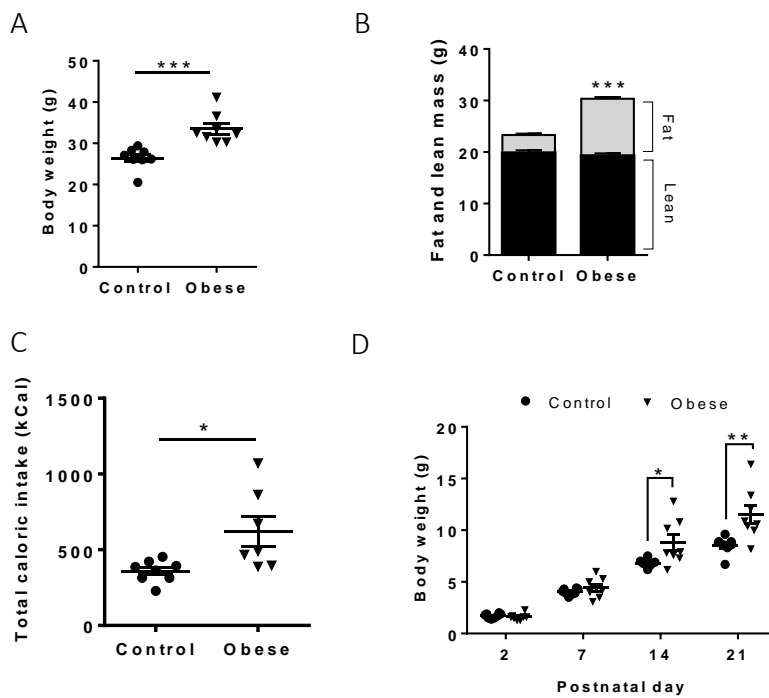

### Supplementary Figure 3.

#### *Brown Adipose*

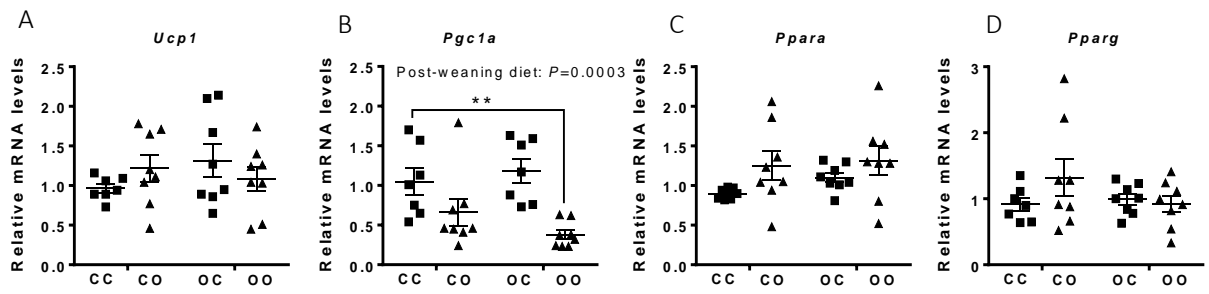

#### *Subcutaneous Adipose*

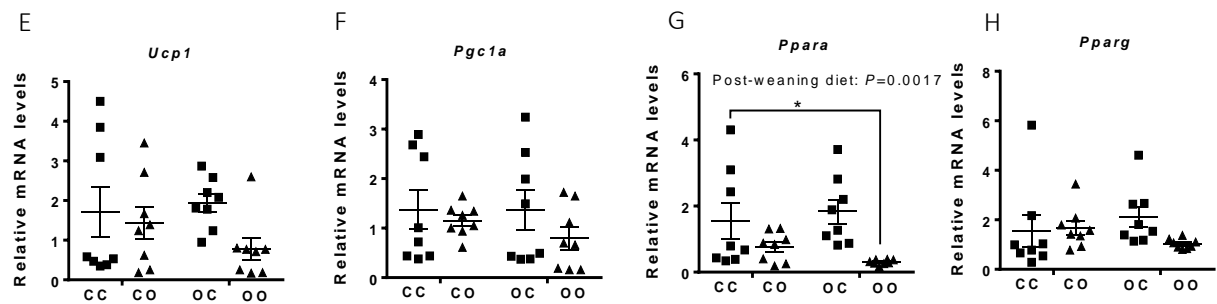

Supplement: cvy082_supp.pdf [file cvy082_supp.pdf]
